# Supplementary material for: Three Novel Bacteria Associated with Two Centric Diatom Species from the Mediterranean Sea, Thalassiosira rotula and Skeletonema marinoi
Source: MDPI journal article supplement (doi:10.3390/ijms222413199), 2021-12-07
Supplement: s1 [file s1]

# Three novel bacteria associated with two centric diatom species from the Mediterranean Sea, *Thalassiosira rotula* and *Skeletonema marinoi*

Federica Di Costanzo<sup>1,2</sup>, Valeria Di Dato<sup>1\*</sup>, Leonardo Joaquim van Zyl<sup>3\*</sup>, Adele Cutignano<sup>1,4</sup>, Francesco Esposito<sup>1</sup>, Marla Trindade<sup>3+</sup>, Giovanna Romano<sup>1+</sup>

## Supplementary Figures

**Figure S1.** Analysis of MAG secondary metabolite pathways predicted using antiSMASH.

**Figure S2.** Confirmation of CIs presence in diatoms xenic cultures.

**Figure S3.** Uncropped image showing the detection of MAG following the introduction of *S. marinoi* FE7-FL bacteria into axenic *T. rotula* FE80 cultures.

**Figure S4.** qPCR Standard Curve and its Melt Curve Plot with specific primers for the evaluation of CI-1 abundance in SA fraction of cultures grown in different salinities.

**Figure S5.** qPCR Standard Curve and its Melt Curve Plot with specific primers for the evaluation of MAG abundance in SA-FL culture fractions.

**Figure S6.** Uncropped image showing the detection of MAG growth in different types of media.

**Figure S7.** OD measurement and visual inspection of cultures grown in different types of media.

**Figure S8.** Uncropped image showing MAG detection in a medium F/2¼ with and without DNase treatment over nine days.

**Figure S9.** qPCR Standard Curve and associated melt curve plot with specific primers for the evaluation of MAG abundance in different media.

## Supplementary Tables

**Table S1.** General genome features and MlxS of the Cluster1

**Table S2.** General genome features and MlxS of the Cluster2

**Table S3.** General genome features and MlxS of the Cluster8

**Table S4.** PRISM *T. rotula* Metagenome-Assembled Genomes (MAG) Cluster annotation.

**Table S5.** qPCR quantization of CI-1 abundance in SA fraction of cultures grown in different salinities.

**Table S6.** qPCR Slope, R<sup>2</sup> and % of Efficiency with specific primers for the evaluation of CI-1 abundance in cultures with different salinities.

**Table S7.** qPCR quantization of MAG abundance in SA and FL fractions.

**Table S8.** qPCR Slope, R<sup>2</sup> and % of Efficiency with specific primers for the evaluation of MAG abundance in SA-FL culture fractions samples.

**Table S9.** qPCR quantization of MAG abundance in FE7-FL grown in different media.

**Table S10.** qPCR quantization of MAG abundance in FE7-FL grown in F/2¼ medium supplemented with DNase-treated sonicate.

**Table S11.** qPCR Slope, R<sup>2</sup> and % of Efficiency with specific primers for the evaluation of MAG abundance in different media.

**Table S12.** antiSMASH detection of biosynthetic clusters in the whole metagenome.

**Table S13.** List of primers used for amplification of the selected gene clusters.

**Supplementary information:** Sequences of the clusters-specific genes.

## Supplementary Figures

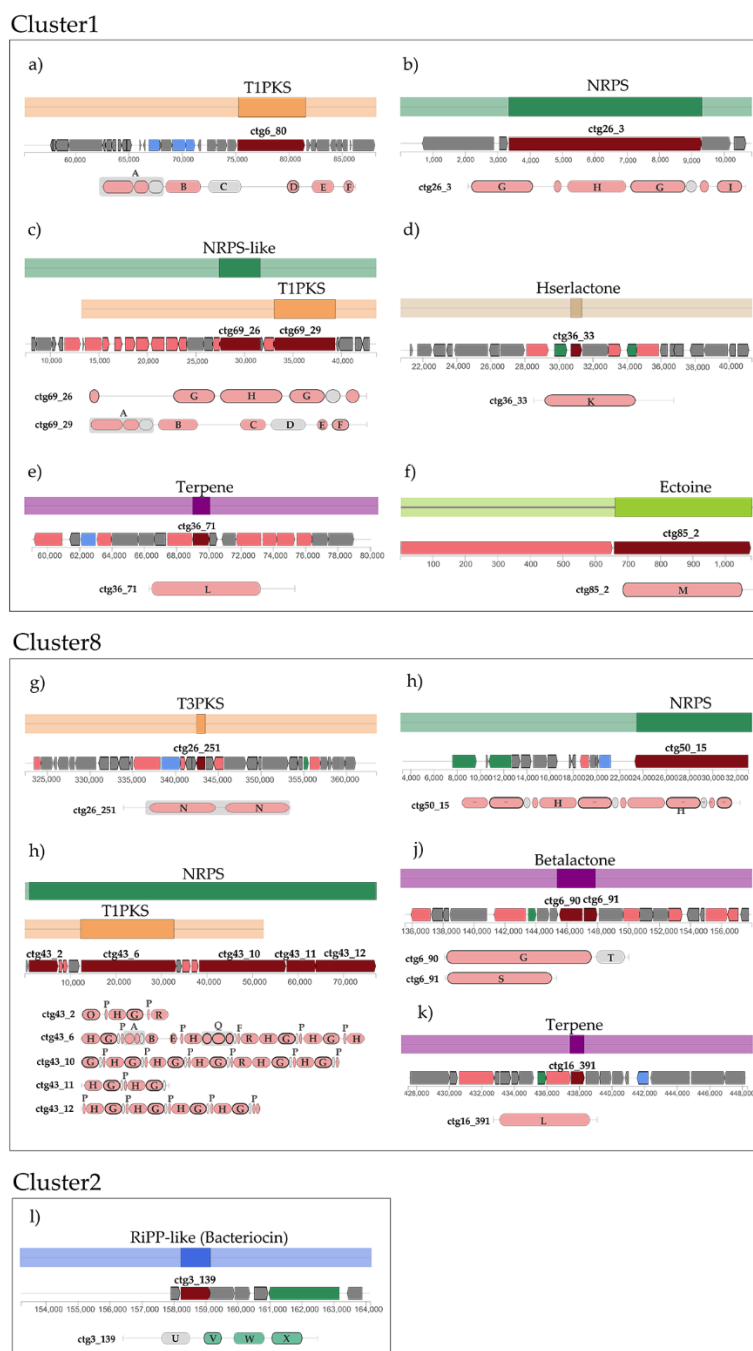

**Figure S1.** Analysis of MAG secondary metabolite pathways predicted using antiSMASH. Representative clusters organization of pathways related to Cluster1 (a-f), Cluster8 (g-k) and Cluster2 (l). The genes constituting the clusters in the pathways are represented in different colors: red for core biosynthetic genes, pink for additional biosynthetic genes, blue for transport-related genes, green for regulatory genes and grey for other genes. The pfam domains constituting each core biosynthetic gene are also represented under the total cluster and are indicated by the letters ctg associated to numbers (i.e. ctg3\_139). Domain abbreviations: A= ketoacyl synthase (KS), B= acyltransferase (AT), C= polyketide synthase dehydratase (PS-DH), D= Enoylreductase (ER), E= ketoreductase (KR), F= phosphopantetheine attachment site (PP), G= AMP-binding, H= condensation, I= thioesterase (TE), J= Bac\_luciferase, K= Autoinducer synthase, L= squalene/phytoene synthase (SQS\_PSY), M= Ectoine synthase, N= Chalcone and stylobene synthase, O= Co-enzyme A ligase (CAL), P= Peptidyl carrier protein (PCP), Q= Adenylation domain with integrated oxidase domain (A-OX), R= Epimerization, S=HMGL-like, T= C-terminal, U= Pkinase domain-containing protein 9 (PAS\_9), V= His Kinase A (phosphoacceptor) domain (HisKA), W= Histidine kinase-like ATPases (HATPase c), X= Response regulator.

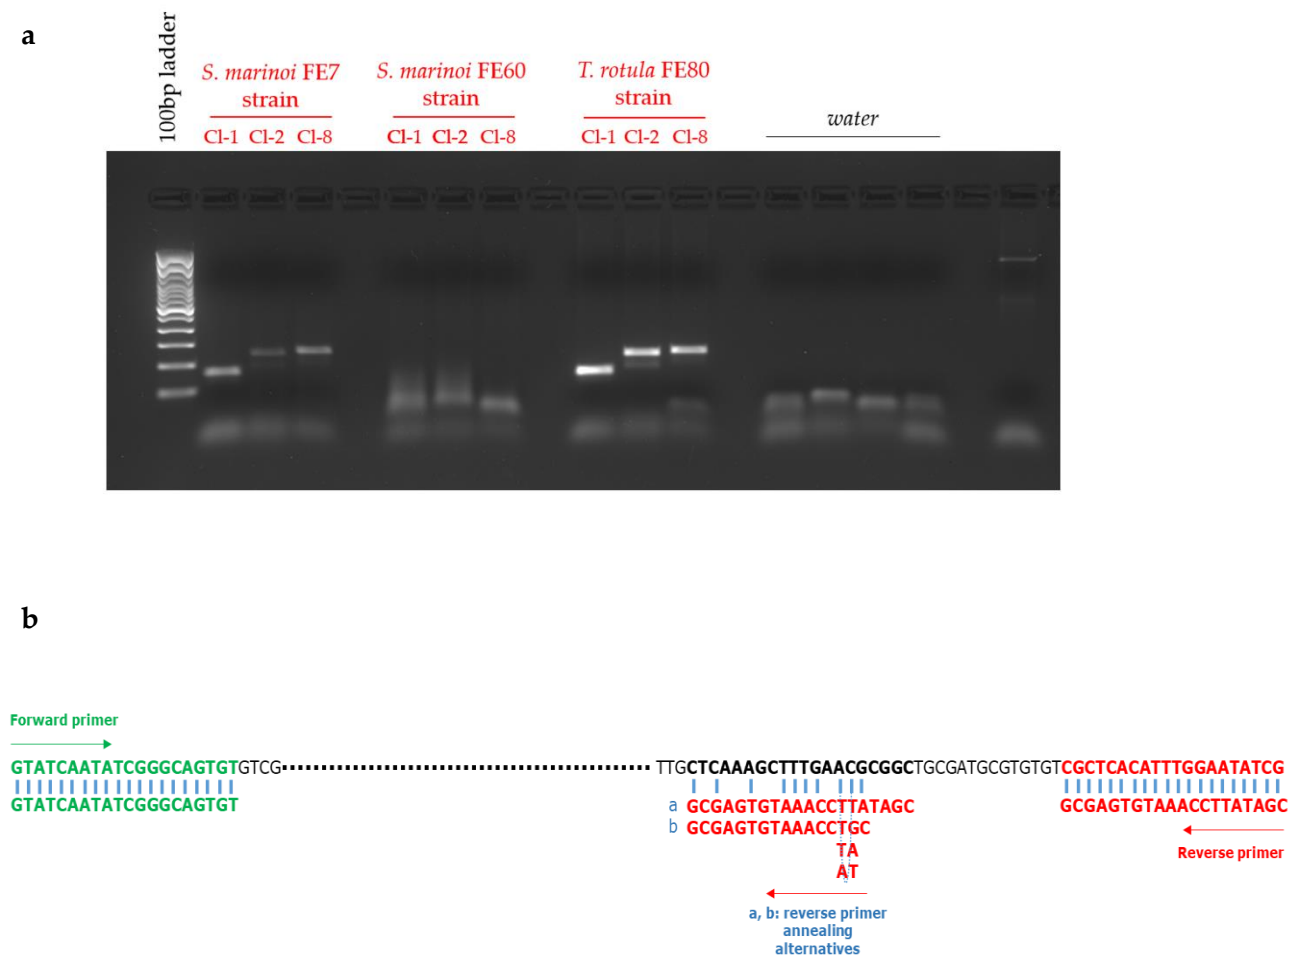

**Figure S2.** Confirmation of Cls presence in diatoms xenic cultures.

**a.** Uncropped image showing the MAG presence in different diatom species and strains. PCR amplification from 50ng of free-living bacterial fraction (FL) genomic DNA (gDNAs) with MAG-specific primers. gDNAs were extracted from the FL fraction of *Thalassiosira rotula* FE80 strain, *Skeletonema marinoi* FE7 and FE60 strains harvested at day 7 of growth. Abbreviations: CI-1= Cluster1, CI-2= Cluster2, CI-8= Cluster8. 100bp ladder: from bottom to top: 100, 200, 300, 400, 500, 600, 700, 800, 900, 1000, 1200, 1500, 2000, 3000 bps.

**b.** CI-2 reverse primer alternative annealing sites responsible for the lower band visible in panel **a**- lanes *S. marinoi* FE7 strain and *T. rotula* FE80 strain, CI-2. The reverse primer has some aspecific annealing possibilities forward in the sequence, in respect to the original primer site chosen for the amplification. Sequencing of the lower band confirmed its specificity as CI-2 contig\_82 and its derivation from a second annealing site of the reverse primer.

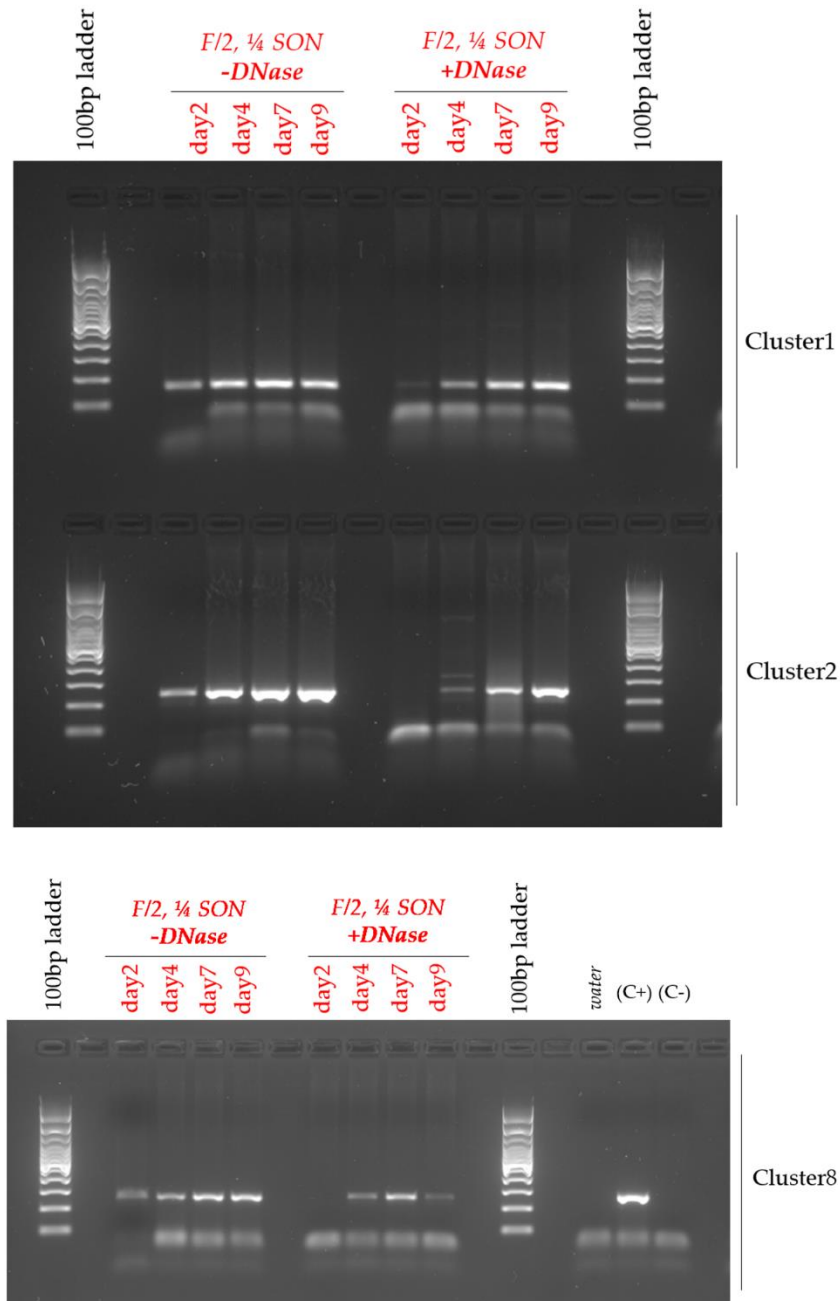

**Figure S3.** Uncropped image showing the detection of MAG following the introduction of *S. marinoi* FE7-FL bacteria into axenic *T. rotula* FE80 cultures. MAG PCR amplification from 50ng of strictly-associated (SA) and FL fractions gDNAs collected from *T. rotula* FE80 cultures in which FE7-FL bacteria were reintroduced. MAG presence was inspected after 1 (FE80\_1), 3 (FE80\_3), 6 (FE80\_6) and 8 (FE80\_8) months from the bacterial reintroduction. All the cultures were harvested at day 7 of growth. Abbreviations: (C-) = mixed gDNA from FE80 culture in which bacteria were not added, (C+) = mixed gDNA from FE7 culture. 100bp ladder: from bottom to top: 100, 200, 300, 400, 500, 600, 700, 800, 900, 1000, 1200, 1500, 2000, 3000 bps.

## Cluster1

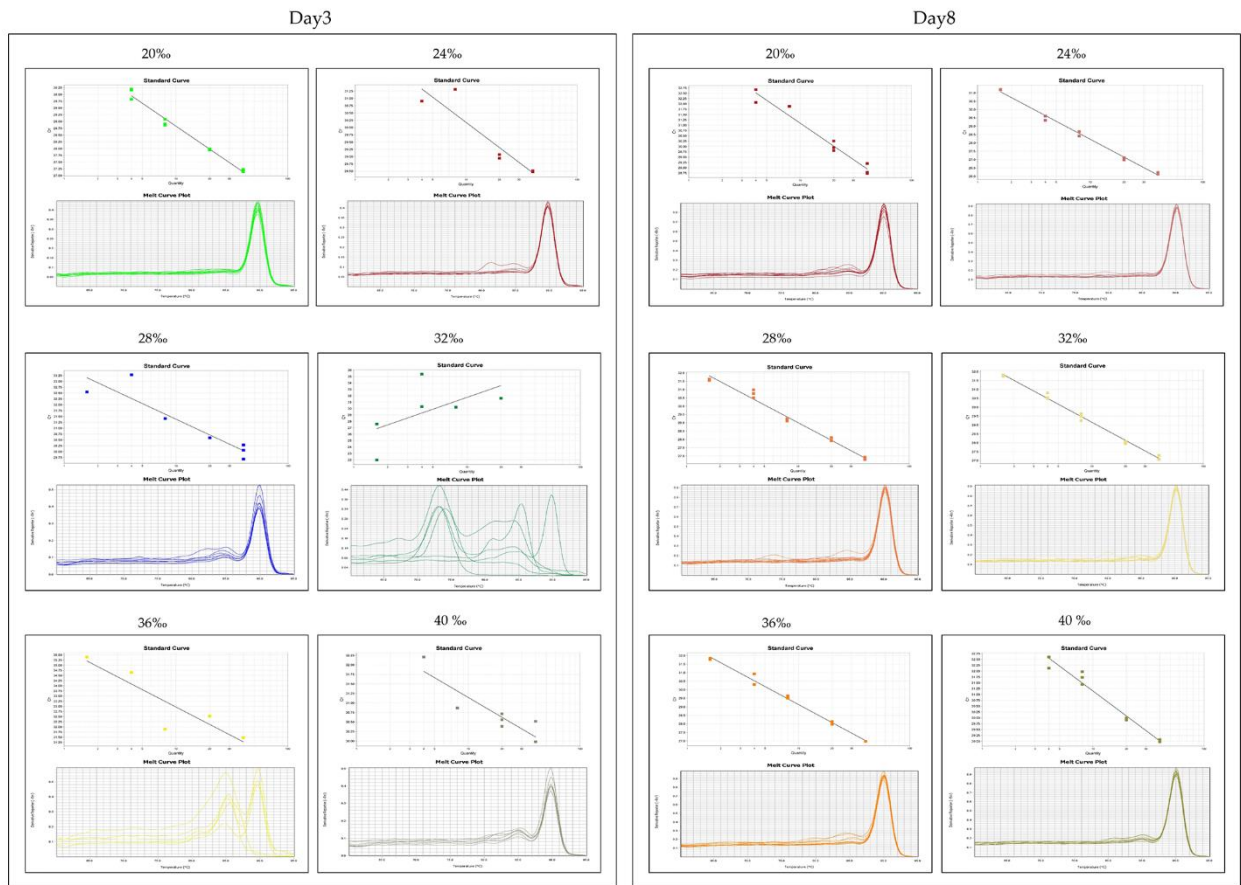

**Figure S4.** qPCR Standard Curves and their Melt Curve Plots with specific primers for the evaluation of CI-1 abundance in SA fraction of cultures grown in different salinities. A standard curve was made for each salinity both at day 3 and day 8 of growth.

Cluster1

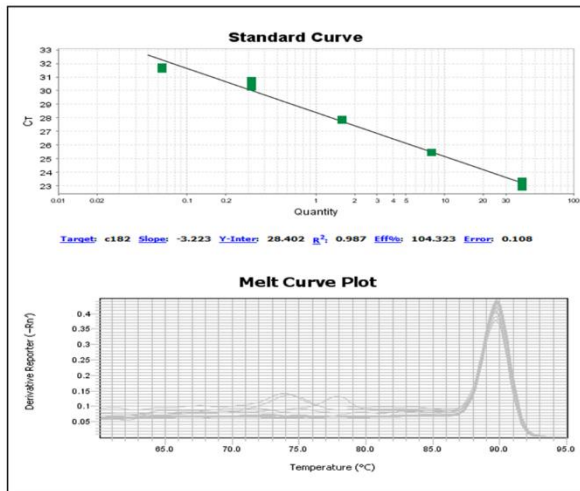

Cluster2

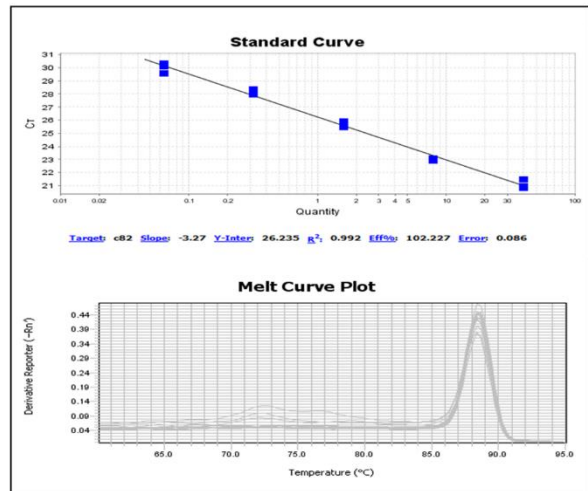

Cluster8

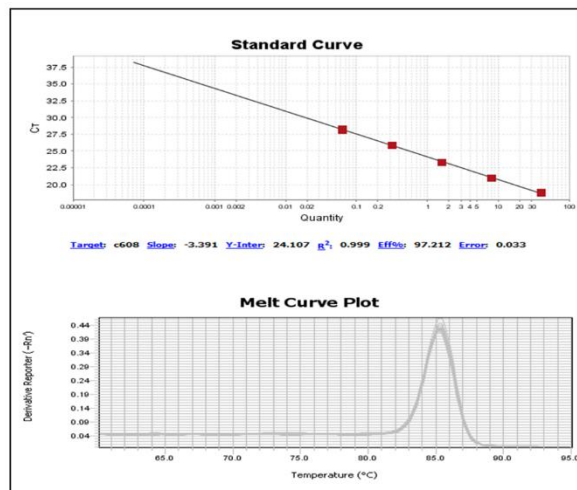

**Figure S5.** qPCR Standard Curve and its Melt Curve Plot with specific primers for the evaluation of MAG abundance in SA-FL culture fractions

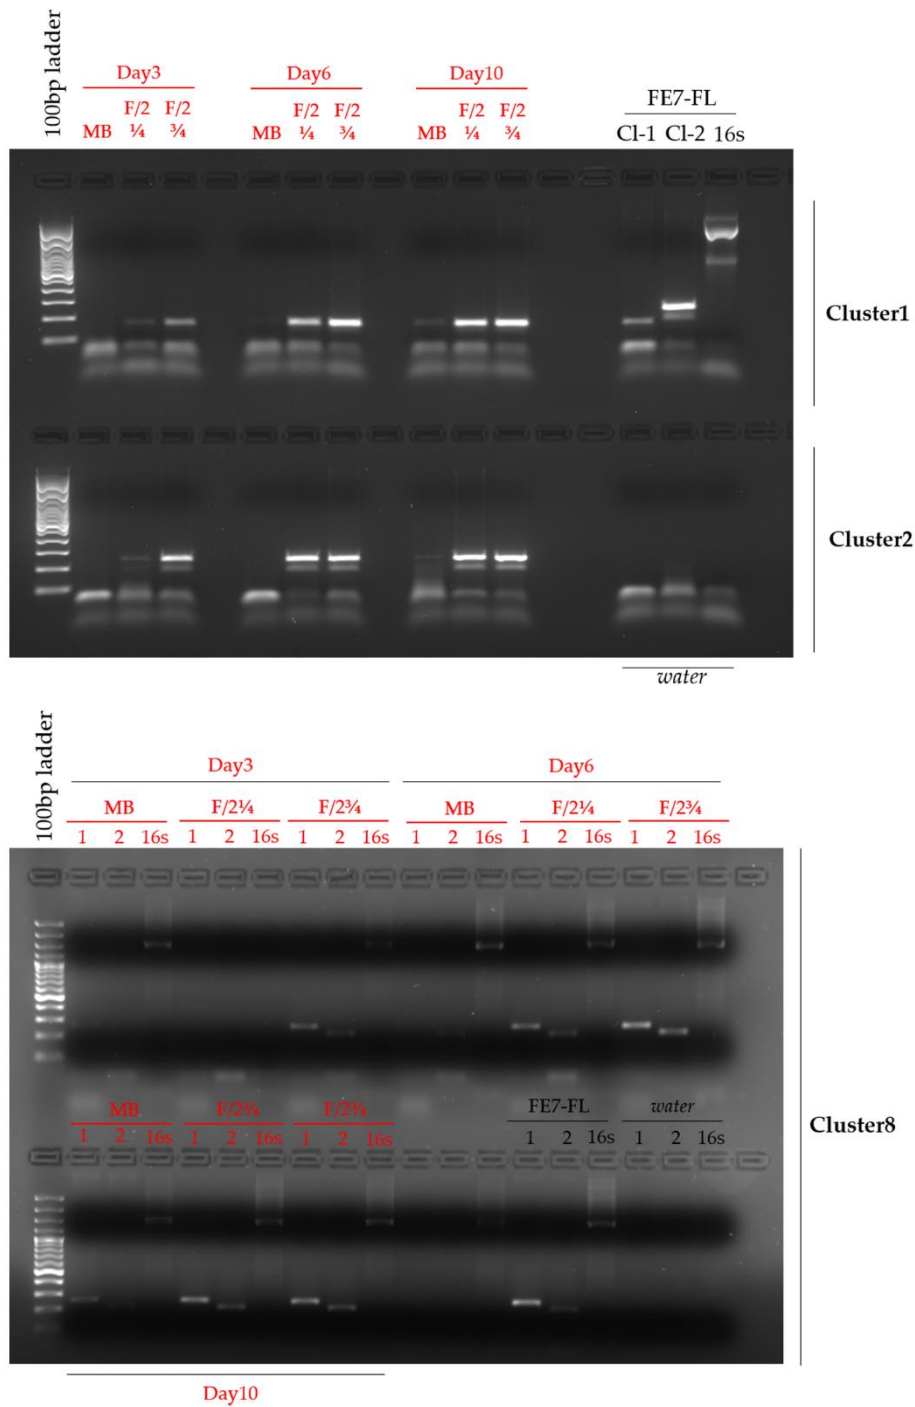

**Figure S6.** Uncropped image showing the detection of MAG growth in different types of media. PCR amplifications with MAG-specific primers on gDNA (50ng) of FE7-FL grown in the following types of medium: Marine Broth supplemented with FE7 spent culture medium (MB), F/2 supplemented with two different sonicated diatoms concentrations ( $\frac{1}{4}$  and  $\frac{3}{4}$ ). Bacterial growth was followed along ten days. Abbreviations: Cl-1= Cluster1, Cl-2= Cluster2, 16s= E9/ U1510 universal primer. For Cluster8 were used two primer pairs (1= C8\_c988; 2= C8\_c450). 100bp ladder: from bottom to top: 100, 200, 300, 400, 500, 600, 700, 800, 900, 1000, 1200, 1500, 2000, 3000 bps.

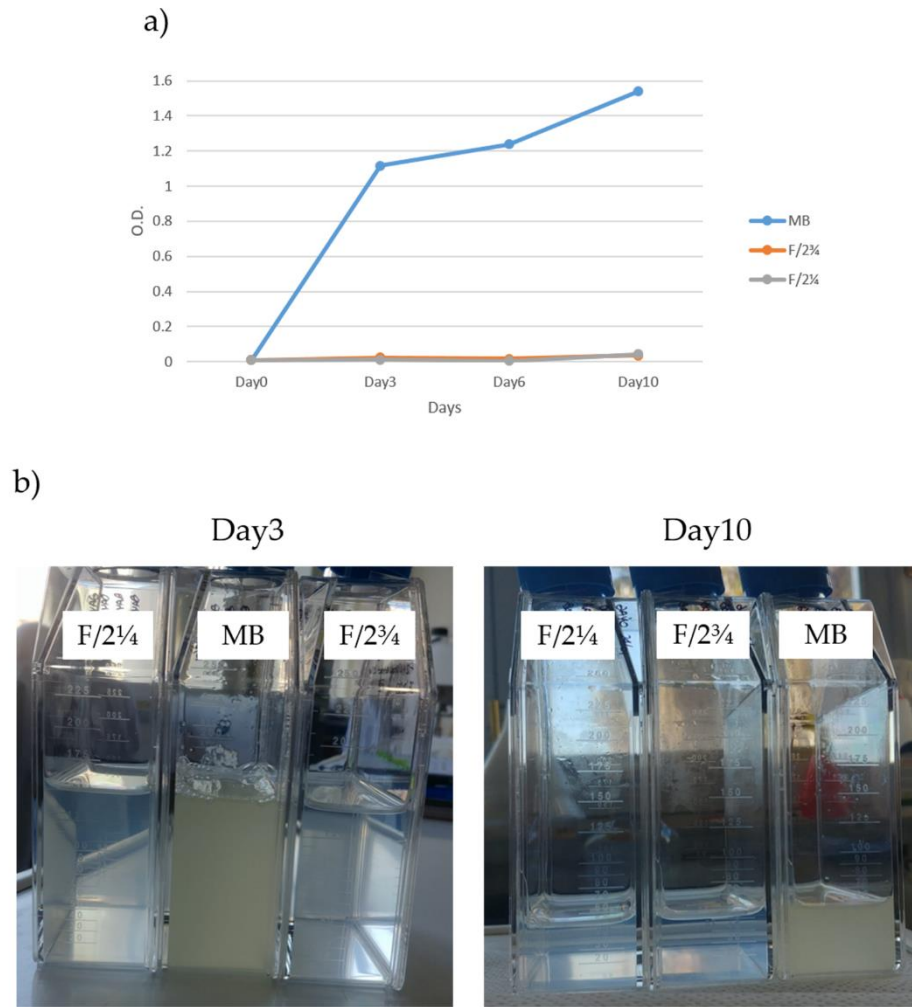

**Figure S7.** Optical density (OD) measurement and visual inspection of cultures grown in different types of media. **a)** OD reading of the FE7-FL total bacteria grown in MB or F/2 with the two sonicate concentrations. The OD were normalized on the blank (only MB or only F/2 without bacteria) and the means of three reads for each time point are reported in the graph; **b)** Visual inspection of the total FE7-FL bacteria growing in the three different media at day3 (starting sampling point) and day10 (final sampling point).



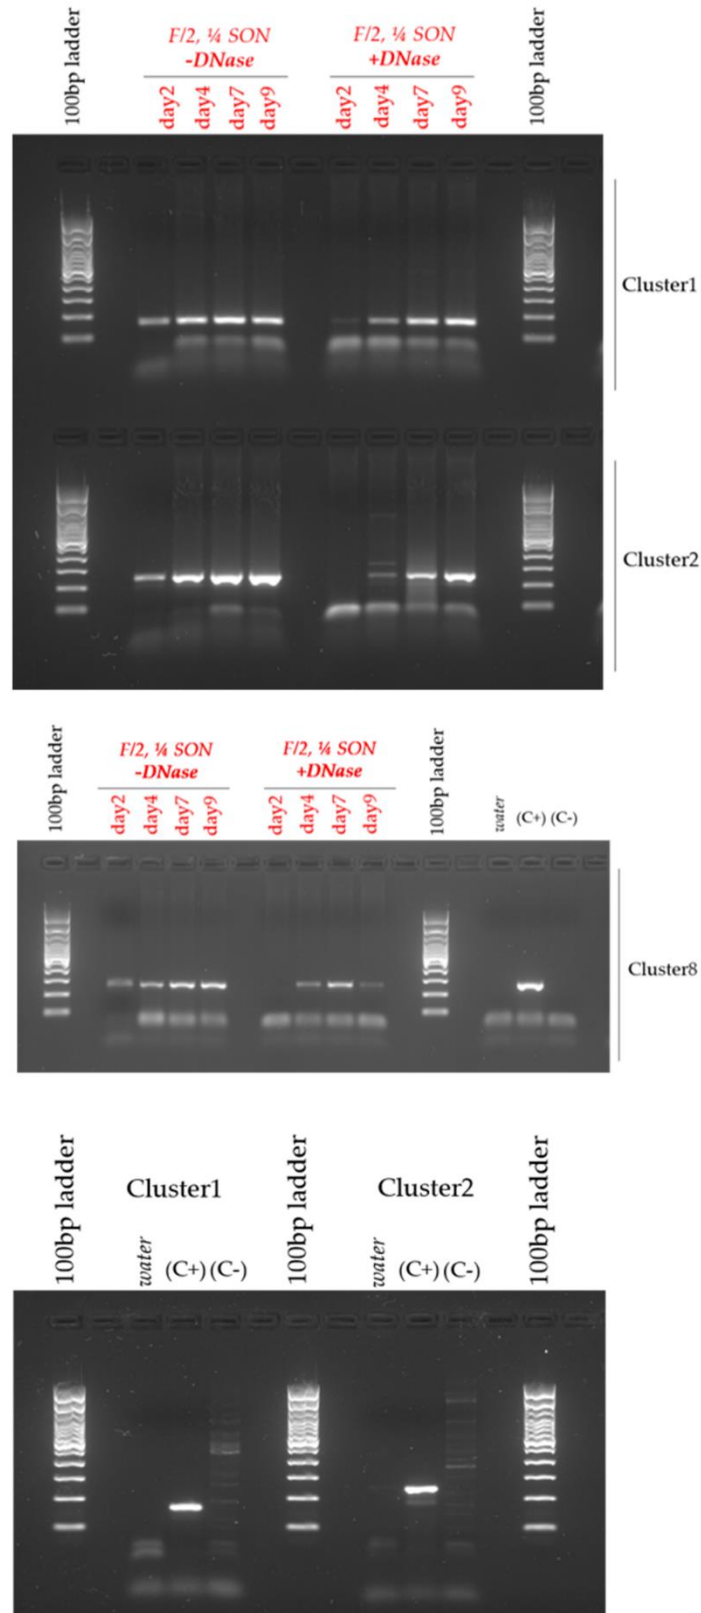

**Figure S8.** Uncropped image showing MAG detection in a medium F/2 $\frac{1}{4}$  with and without DNase treatment over nine days. PCR-based MAG detection in medium F/2 $\frac{1}{4}$  with and without DNase treatment over nine days. PCR amplifications with MAG-specific primers on gDNA (50ng) from FE7-FL bacteria grown in F/2 $\frac{1}{4}$  medium with (+DNase) and without (-DNase) the addition of DNase. MAG presence was evaluated along nine days of culture growth. Abbreviations: (C-)= mixed gDNA from FE80 culture before the reintroduction of the bacteria, (C+)= mixed gDNA from FE7 culture. 100bp ladder: from bottom to top: 100, 200, 300, 400, 500, 600, 700, 800, 900, 1000, 1200, 1500, 2000, 3000 bps.

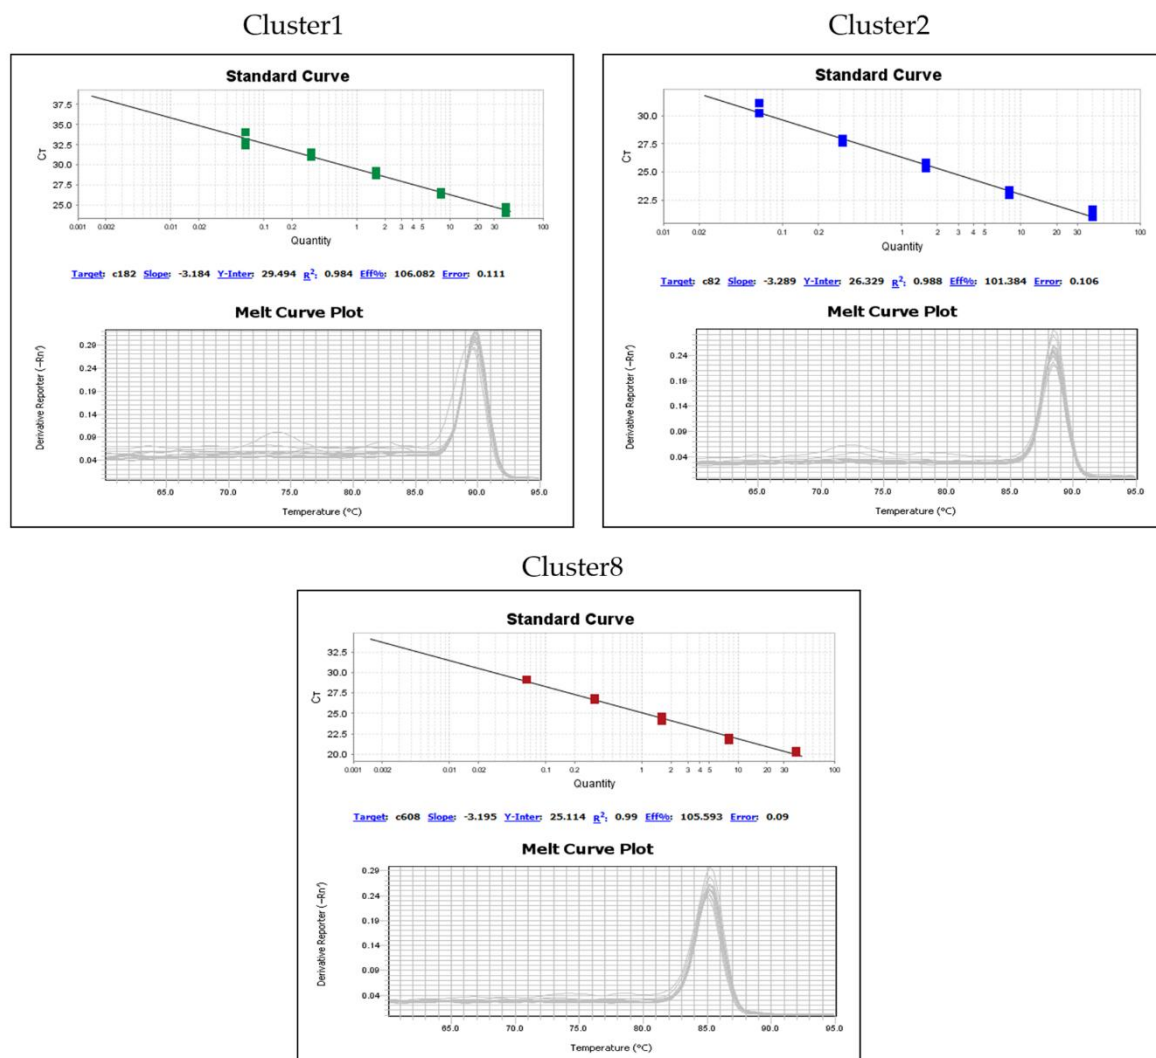

**Figure S9.** qPCR Standard Curve and its Melt Curve Plot with specific primers for the evaluation of MAG abundance in different media cultures.

## Supplementary Tables

**Table S1.** General genome features and MlxS of the Cluster1.

| Items                             | Description                                                                                                                                                                                                       |
|-----------------------------------|-------------------------------------------------------------------------------------------------------------------------------------------------------------------------------------------------------------------|
| <b>General features</b>           |                                                                                                                                                                                                                   |
| <b>Classification Cluster1</b>    | Domain <i>Bacteria</i><br>Phylum <i>Proteobacteria</i><br>Class <i>Alphaproteobacteria</i><br>Order <i>Rhodobacterales</i><br>Family <i>Rhodobacteraceae</i><br>Genus <i>Aestuariiivita</i><br>Species <i>sp.</i> |
| <b>Gram stain</b>                 | Negative                                                                                                                                                                                                          |
| <b>Cell shape</b>                 | NA                                                                                                                                                                                                                |
| <b>Motility</b>                   | Motile                                                                                                                                                                                                            |
| <b>Sporulation</b>                | NA                                                                                                                                                                                                                |
| <b>Temperature Range; Optimum</b> | 18°C                                                                                                                                                                                                              |
| <b>pH range; optimum</b>          | NA                                                                                                                                                                                                                |
| <b>Salinity range; optimum</b>    | 36ppm                                                                                                                                                                                                             |
| <b>Carbon source</b>              | NA                                                                                                                                                                                                                |
| MIGS data                         |                                                                                                                                                                                                                   |
| <b>Investigation_type</b>         | Bacteria                                                                                                                                                                                                          |
| <b>Project_name</b>               | Genome sequence of three bacteria associated with the diatom <i>Thalassiosira rotula</i>                                                                                                                          |
| <b>Lat_lon</b>                    | 40°48.5'N, 14°15'E                                                                                                                                                                                                |
| <b>Depth</b>                      | NA                                                                                                                                                                                                                |
| <b>Alt_elev</b>                   | NA                                                                                                                                                                                                                |
| <b>Geo_loc_name</b>               | Mediterranean sea: Central Tyrrhenian sea: East Sector                                                                                                                                                            |
| <b>Collection_date</b>            | 2011                                                                                                                                                                                                              |
| <b>Env_biome</b>                  | marine biome [ENVO:00000447]                                                                                                                                                                                      |
| <b>Env_feature</b>                | alga [ENVO:02500019]                                                                                                                                                                                              |
| <b>Env_material</b>               | water [ENVO:00002006]                                                                                                                                                                                             |
| <b>Env_package</b>                | host-associated environment [ENVO:01001000]                                                                                                                                                                       |
| <b>Ref_biomaterial</b>            | NA                                                                                                                                                                                                                |
| <b>Pathogenicity</b>              | NA                                                                                                                                                                                                                |
| <b>Biotic_relationship</b>        | Both free living and strictly associated                                                                                                                                                                          |
| <b>Trophic_level</b>              | Photoheterotroph                                                                                                                                                                                                  |
| <b>Rel_to_oxygen</b>              | Aerobic                                                                                                                                                                                                           |
| <b>Isol_growth_condt</b>          | NA                                                                                                                                                                                                                |
| <b>Samp_store_temp</b>            | 18°C                                                                                                                                                                                                              |
| <b>Sediment_type</b>              | NA                                                                                                                                                                                                                |
| Genome assembly data              |                                                                                                                                                                                                                   |

|                                              |                |
|----------------------------------------------|----------------|
| <b>Seq_meth</b>                              | Illumina MiSeq |
| <b>Assembly</b>                              | CLC Genomics   |
| <b>Finishing_strategy</b>                    | N/A            |
| <b>Annot_source</b>                          | PGAP (NCBI)    |
| MAG Genome attribute                         |                |
| <b>Total number of reads before trimming</b> | 20,505,104     |
| <b>Total number of reads after trimming</b>  | 19,519,539     |
| <b>Average read length</b>                   | 239,5          |
| <b>Number of reads in contigs</b>            | 17,286,414     |
| <b>Number of contigs &gt;5kb</b>             | 416            |
| <b>N50 (bp)</b>                              | 146,992        |
| <b>Assembly size (Mb)</b>                    | 22,15          |
| <b>Maximum contig length (bp)</b>            | 952,220        |

**Table S2.** General genome features and MlXS of the Cluster2.

| Items                             | Description                                                                                                                                                                                               |
|-----------------------------------|-----------------------------------------------------------------------------------------------------------------------------------------------------------------------------------------------------------|
| <b>General features</b>           |                                                                                                                                                                                                           |
| <b>Classification Cluster2</b>    | Domain <i>Bacteria</i><br>Phylum <i>Proteobacteria</i><br>Class <i>Alphaproteobacteria</i><br>Order <i>Parvibaculales</i><br>Family <i>Parvibaculaceae</i><br>Genus <i>Mf105b01</i><br>Species <i>sp.</i> |
| <b>Gram stain</b>                 | Negative                                                                                                                                                                                                  |
| <b>Cell shape</b>                 | NA                                                                                                                                                                                                        |
| <b>Motility</b>                   | Motile                                                                                                                                                                                                    |
| <b>Sporulation</b>                | NA                                                                                                                                                                                                        |
| <b>Temperature Range; Optimum</b> | 18°C                                                                                                                                                                                                      |
| <b>pH range; optimum</b>          | NA                                                                                                                                                                                                        |
| <b>Salinity range; optimum</b>    | 36ppm                                                                                                                                                                                                     |
| <b>Carbon source</b>              | NA                                                                                                                                                                                                        |
| MIGS data                         |                                                                                                                                                                                                           |
| <b>Investigation_type</b>         | Bacteria                                                                                                                                                                                                  |
| <b>Project_name</b>               | Genome sequence of three bacteria associated with the diatom <i>Thalassiosira rotula</i>                                                                                                                  |
| <b>Lat_lon</b>                    | 40°48.5'N, 14°15'E                                                                                                                                                                                        |
| <b>Depth</b>                      | NA                                                                                                                                                                                                        |
| <b>Alt_elev</b>                   | NA                                                                                                                                                                                                        |
| <b>Geo_loc_name</b>               | Mediterranean sea: Central Tyrrhenian sea: East Sector                                                                                                                                                    |
| <b>Collection_date</b>            | 2011                                                                                                                                                                                                      |
| <b>Env_biome</b>                  | marine biome [ENVO:00000447]                                                                                                                                                                              |
| <b>Env_feature</b>                | alga [ENVO:02500019]                                                                                                                                                                                      |
| <b>Env_material</b>               | water [ENVO:00002006]                                                                                                                                                                                     |
| <b>Env_package</b>                | host-associated environment [ENVO:01001000]                                                                                                                                                               |
| <b>Ref_biomaterial</b>            | NA                                                                                                                                                                                                        |
| <b>Pathogenicity</b>              | NA                                                                                                                                                                                                        |
| <b>Biotic_relationship</b>        | Both free living and strictly associated                                                                                                                                                                  |
| <b>Trophic_level</b>              |                                                                                                                                                                                                           |
| <b>Rel_to_oxygen</b>              | Aerobic                                                                                                                                                                                                   |
| <b>Isol_growth_condt</b>          | NA                                                                                                                                                                                                        |
| <b>Samp_store_temp</b>            | 18°C                                                                                                                                                                                                      |
| <b>Sediment_type</b>              | NA                                                                                                                                                                                                        |
| Genome assembly data              |                                                                                                                                                                                                           |
| <b>Seq_meth</b>                   | Illumina MiSeq                                                                                                                                                                                            |
| <b>Assembly</b>                   | CLC Genomics                                                                                                                                                                                              |

|                                              |             |
|----------------------------------------------|-------------|
| <b>Finishing_strategy</b>                    | N/A         |
| <b>Annot_source</b>                          | PGAP (NCBI) |
| <b>MAG Genome attribute</b>                  |             |
| <b>Total number of reads before trimming</b> | 20,505,104  |
| <b>Total number of reads after trimming</b>  | 19,519,539  |
| <b>Average read length</b>                   | 239,5       |
| <b>Number of reads in contigs</b>            | 17,286,414  |
| <b>Number of contigs &gt;5kb</b>             | 416         |
| <b>N50 (bp)</b>                              | 146,992     |
| <b>Assembly size (Mb)</b>                    | 22,15       |
| <b>Maximum contig length (bp)</b>            | 952,220     |

**Table S3.** General genome features and MlxS of the Cluster8.

| Items                             | Description                                                                                                                                                                                         |
|-----------------------------------|-----------------------------------------------------------------------------------------------------------------------------------------------------------------------------------------------------|
| <b>General features</b>           |                                                                                                                                                                                                     |
| <b>Classification Cluster8</b>    | Domain <i>Bacteria</i><br>Phylum <i>Bacteroidota</i><br>Class <i>Bacteroidia</i><br>Order <i>Cytophagales</i><br>Family <i>Cyclobacteriaceae</i><br>Genus <i>Roseivirga_A</i><br>Species <i>sp.</i> |
| <b>Gram stain</b>                 | Negative                                                                                                                                                                                            |
| <b>Cell shape</b>                 | NA                                                                                                                                                                                                  |
| <b>Motility</b>                   | Nonmotile                                                                                                                                                                                           |
| <b>Sporulation</b>                | NA                                                                                                                                                                                                  |
| <b>Temperature Range; Optimum</b> | 18°C                                                                                                                                                                                                |
| <b>pH range; optimum</b>          | NA                                                                                                                                                                                                  |
| <b>Salinity range; optimum</b>    | 36ppm                                                                                                                                                                                               |
| <b>Carbon source</b>              | NA                                                                                                                                                                                                  |
| MIGS data                         |                                                                                                                                                                                                     |
| <b>Investigation_type</b>         | Bacteria                                                                                                                                                                                            |
| <b>Project_name</b>               | Genome sequence of three bacteria associated with the diatom <i>Thalassiosira rotula</i>                                                                                                            |
| <b>Lat_lon</b>                    | 40°48.5'N, 14°15'E                                                                                                                                                                                  |
| <b>Depth</b>                      | NA                                                                                                                                                                                                  |
| <b>Alt_elev</b>                   | NA                                                                                                                                                                                                  |
| <b>Geo_loc_name</b>               | Mediterranean sea: Central Tyrrhenian sea: East Sector                                                                                                                                              |
| <b>Collection_date</b>            | 2011                                                                                                                                                                                                |
| <b>Env_biome</b>                  | marine biome [ENVO:00000447]                                                                                                                                                                        |
| <b>Env_feature</b>                | alga [ENVO:02500019]                                                                                                                                                                                |
| <b>Env_material</b>               | water [ENVO:00002006]                                                                                                                                                                               |
| <b>Env_package</b>                | host-associated environment [ENVO:01001000]                                                                                                                                                         |
| <b>Num_replicons</b>              |                                                                                                                                                                                                     |
| <b>Ref_biomaterial</b>            | NA                                                                                                                                                                                                  |
| <b>Pathogenicity</b>              | NA                                                                                                                                                                                                  |
| <b>Biotic_relationship</b>        | Both free living and strictly associated                                                                                                                                                            |
| <b>Trophic_level</b>              | Chemoorganotroph                                                                                                                                                                                    |
| <b>Rel_to_oxygen</b>              | Aerobic                                                                                                                                                                                             |
| <b>Isol_growth_condt</b>          | NA                                                                                                                                                                                                  |
| <b>Samp_store_temp</b>            | 18°C                                                                                                                                                                                                |
| <b>Sediment_type</b>              | NA                                                                                                                                                                                                  |
| Genome assembly data              |                                                                                                                                                                                                     |
| <b>Seq_meth</b>                   | Illumina MiSeq                                                                                                                                                                                      |

|                                              |              |
|----------------------------------------------|--------------|
| <b>Assembly</b>                              | CLC Genomics |
| <b>Finishing_strategy</b>                    | N/A          |
| <b>Annot_source</b>                          | PGAP (NCBI)  |
| <b>MAG Genome attribute</b>                  |              |
| <b>Total number of reads before trimming</b> | 20,505,104   |
| <b>Total number of reads after trimming</b>  | 19,519,539   |
| <b>Average read length</b>                   | 239,5        |
| <b>Number of reads in contigs</b>            | 17,286,414   |
| <b>Number of contigs &gt;5kb</b>             | 416          |
| <b>N50 (bp)</b>                              | 146,992      |
| <b>Assembly size (Mb)</b>                    | 22,15        |
| <b>Maximum contig length (bp)</b>            | 952,220      |



**Table S4.** PRISM *T. rotula* Metagenome-Assembled Genomes (MAG) Cluster annotation.

| T. rotula MAG-Cluster1           |                                                                                                                                                                                                                                                                                                                                                                                                                                                                                                                                           |                                                        |                                                                                                                              |                                                                                                                                                                                                                                   |                                       |                                                                                                                                                                                           |                      |
|----------------------------------|-------------------------------------------------------------------------------------------------------------------------------------------------------------------------------------------------------------------------------------------------------------------------------------------------------------------------------------------------------------------------------------------------------------------------------------------------------------------------------------------------------------------------------------------|--------------------------------------------------------|------------------------------------------------------------------------------------------------------------------------------|-----------------------------------------------------------------------------------------------------------------------------------------------------------------------------------------------------------------------------------|---------------------------------------|-------------------------------------------------------------------------------------------------------------------------------------------------------------------------------------------|----------------------|
| Biosynthetic Cluster             | PK                                                                                                                                                                                                                                                                                                                                                                                                                                                                                                                                        |                                                        | NRP                                                                                                                          | acyl homoserine lactone                                                                                                                                                                                                           | Acyl homoserine lactone               | PK, NRP                                                                                                                                                                                   | Ectoine              |
| Biosynthetic assemblies (ORF #)  | 71, 75                                                                                                                                                                                                                                                                                                                                                                                                                                                                                                                                    | 56, 60, 62                                             | 37626, 3                                                                                                                     | 33, 50261                                                                                                                                                                                                                         | 25                                    | 23, 24, 26                                                                                                                                                                                | 2                    |
| ORFs Domains                     | 71: Phosphopantetheinyltransferase;<br>75: Ketosynthase, Acyltransferase, Dehydratase, Enoylreductase, Ketoreductase, Thiolation.                                                                                                                                                                                                                                                                                                                                                                                                         | 56: Ketosynthase; 60: Thiolation; 62: Acyltransferase. | 37626: Lasso peptide precursor; 3: Acyl adenylating enzyme, Thiolation, Condensation, Adenylation, Thiolation, Thioesterase. | 33: Acyl homoserine lactone synthase; 50261: Dehydratase.                                                                                                                                                                         | 25: Acyl homoserine lactone synthase. | 23: Phosphopantetheinyltransferase; 24: Formyltransferase, Adenylation, Adenylation, Thiolation; 26: Ketosynthase, Acyltransferase, Ketoreductase, Dehydratase, Thiolation, Thioesterase. | 2: Ectoine synthase. |
| T. rotula MAG-Cluster2           |                                                                                                                                                                                                                                                                                                                                                                                                                                                                                                                                           |                                                        |                                                                                                                              |                                                                                                                                                                                                                                   |                                       |                                                                                                                                                                                           |                      |
| Biosynthetic Cluster             | PK                                                                                                                                                                                                                                                                                                                                                                                                                                                                                                                                        |                                                        |                                                                                                                              |                                                                                                                                                                                                                                   |                                       |                                                                                                                                                                                           |                      |
| Biosynthetic assemblies (ORFs #) | 352, 355, 356                                                                                                                                                                                                                                                                                                                                                                                                                                                                                                                             |                                                        |                                                                                                                              |                                                                                                                                                                                                                                   |                                       |                                                                                                                                                                                           |                      |
| ORFs Domains                     | 352: Acyltransferase;<br>355: Thiolation;<br>356: Ketosynthase.                                                                                                                                                                                                                                                                                                                                                                                                                                                                           |                                                        |                                                                                                                              |                                                                                                                                                                                                                                   |                                       |                                                                                                                                                                                           |                      |
| T. rotula MAG-Cluster8           |                                                                                                                                                                                                                                                                                                                                                                                                                                                                                                                                           |                                                        |                                                                                                                              |                                                                                                                                                                                                                                   |                                       |                                                                                                                                                                                           |                      |
| Biosynthetic Cluster             | PK, NRP                                                                                                                                                                                                                                                                                                                                                                                                                                                                                                                                   |                                                        | NRP                                                                                                                          | lasso peptide                                                                                                                                                                                                                     |                                       |                                                                                                                                                                                           |                      |
| Biosynthetic assemblies (ORFs #) | 2, 3, 6, 8, 10, 11, 12                                                                                                                                                                                                                                                                                                                                                                                                                                                                                                                    |                                                        | 13, 17                                                                                                                       | 178, 80751, 188, 80664, 191, 192                                                                                                                                                                                                  |                                       |                                                                                                                                                                                           |                      |
| ORFs Domains                     | 2: Acyl adenylating enzyme, Thiolation, Condensation, Adenylation, Thiolation, Epimerization.<br>3: 2,3-diaminopropionate biosynthesis protein SbnA.<br>6: Condensation, Adenylation, Thiolation, Ketosynthase, Acyltransferase, Ketoreductase, Ketoreductase, Thiolation, Condensation, Adenylation, Adenylation, Thiolation, Epimerization, Condensation, Adenylation, Thiolation, Condensation, Thiolation, Condensation.<br>8: Amidotransferase.<br>10: Adenylation, Thiolation, Condensation, Adenylation, Thiolation, Condensation, |                                                        | 13: Thioesterase.<br>17: Condensation, Adenylation, Thiolation, Condensation, Adenylation, Thiolation, Thioesterase.         | 178: Lasso peptide transglutaminase homolog; 80751: Putative lasso peptide precursor;<br>188: Sulfotransferase; 80664: Putative lasso peptide precursor;<br>191: Sulfotransferase; 192: Lasso peptide asparagine synthase homolog |                                       |                                                                                                                                                                                           |                      |

---

Adenylation, Thiolation,  
Condensation, Adenylation,  
Thiolation, Epimerization,  
Condensation, Adenylation,  
Thiolation, Condensation,  
Adenylation, Thiolation.

11:

Condensation, Adenylation,  
Thiolation, Condensation,  
Adenylation.

12:

Thiolation, Condensation,  
Adenylation, Thiolation,  
Condensation, Adenylation,  
Thiolation, Condensation,  
Adenylation, Thiolation,  
Condensation, Adenylation,  
Thiolation, Condensation.

---

**Table S5.** qPCR quantization of Cl-1 abundance in SA fraction of cultures grown in different salinities.

| <b>Cluster1</b>    |                  |                   |                  |                   |                  |                   |
|--------------------|------------------|-------------------|------------------|-------------------|------------------|-------------------|
| <b>Day3</b>        |                  |                   |                  |                   |                  |                   |
| <b>20‰</b>         |                  | <b>24‰</b>        |                  | <b>28‰</b>        |                  |                   |
| <b>Sample name</b> | Quantity mean    | Quantity SD       | Quantity mean    | Quantity SD       | Quantity mean    | Quantity SD       |
| <b>Replicate_1</b> | 14.5112409591674 | 0.798255980014801 | 8.16201210021972 | 0.606226086616516 | N/D              | N/D               |
| <b>Replicate_2</b> | 11.9483919143676 | 2.14905190467834  | 11.9473886489868 | 2.53087162971496  | N/D              | N/D               |
| <b>Replicate_3</b> | 12.2064056396484 | 3.06914186477661  | 12.0288705825805 | 3.67823576927185  | N/D              | N/D               |
| <b>32‰</b>         |                  | <b>36‰</b>        |                  | <b>40‰</b>        |                  |                   |
| <b>Sample name</b> | Quantity mean    | Quantity SD       | Quantity mean    | Quantity SD       | Quantity mean    | Quantity SD       |
| <b>Replicate_1</b> | N/D              | N/D               | N/D              | N/D               | N/D              | N/D               |
| <b>Replicate_2</b> | N/D              | N/D               | N/D              | N/D               | N/D              | N/D               |
| <b>Replicate_3</b> | N/D              | N/D               | N/D              | N/D               | N/D              | N/D               |
| <b>Day8</b>        |                  |                   |                  |                   |                  |                   |
| <b>20‰</b>         |                  | <b>24‰</b>        |                  | <b>28‰</b>        |                  |                   |
| <b>Sample name</b> | Quantity mean    | Quantity SD       | Quantity mean    | Quantity SD       | Quantity mean    | Quantity SD       |
| <b>Replicate_1</b> | 31.6183595657348 | 5.80254477802653  | 6.68693971633911 | 0.831853449344635 | 11.7782106399536 | 3.32517790794372  |
| <b>Replicate_2</b> | 10.9883317947387 | 1.28338074684143  | 20.596580505371  | 1.56980264186859  | 39.6703758239746 | 1.72131192684173  |
| <b>Replicate_3</b> | 10.3919868469238 | 1.23993575572967  | 8.58546638488769 | 1.17350924015045  | 12.7557649612426 | 1.61978256702423  |
| <b>32‰</b>         |                  | <b>36‰</b>        |                  | <b>40‰</b>        |                  |                   |
| <b>Sample name</b> | Quantity mean    | Quantity SD       | Quantity mean    | Quantity SD       | Quantity mean    | Quantity SD       |
| <b>Replicate_1</b> | 22.0469570159912 | 0.88727593421936  | 13.7929029464721 | 1.13168704509735  | 20.7034702301025 | 2.02587294578552  |
| <b>Replicate_2</b> | 14.0322103500366 | 3.17058825492858  | 30.1682376861572 | 3.14465661499737  | 11.9415206909179 | 0.597728669643402 |
| <b>Replicate_3</b> | 15.5249853134155 | 1.89186143875122  | 26.3027057647705 | 2.68924212455749  | 20.1522417068481 | 1.68568107645698  |

**N/D – Not detected****Table S6.** qPCR Slope, R<sup>2</sup> and % of Efficiency with specific primers for the evaluation of Cl-1 abundance in cultures with different salinities.

| <b>Cluster1</b>        |              |                      |                       |              |                      |                       |
|------------------------|--------------|----------------------|-----------------------|--------------|----------------------|-----------------------|
| <b>Day3</b>            |              |                      |                       | <b>Day8</b>  |                      |                       |
| <b>Standard curves</b> | <b>Slope</b> | <b>R<sup>2</sup></b> | <b>Efficiency (%)</b> | <b>Slope</b> | <b>R<sup>2</sup></b> | <b>Efficiency (%)</b> |
| <b>20‰</b>             | -2.816       | 0.983                | 126.497               | -3.574       | 0.962                | 90.458                |
| <b>24‰</b>             | -2.877       | 0.872                | 122.655               | -3.564       | 0.994                | 90.792                |
| <b>28‰</b>             | -2.228       | 0.852                | 181.147               | -3.536       | 0.982                | 91.763                |
| <b>32‰</b>             | 6.121        | 0.332                | -31.351               | -3.366       | 0.991                | 98.197                |
| <b>36‰</b>             | -2.812       | 0.803                | 126.801               | -3.503       | 0.992                | 92.965                |
| <b>40‰</b>             | -1.722       | 0.799                | 280.820               | -3.538       | 0.971                | 91.717                |

**Table S7.** qPCR quantization of MAG abundance in SA and FL fractions. Quantity Mean and Quantity Standard Deviations (SD) of the three MAG calculated via qPCR data analysis. Abbreviations: SA= strictly associated bacterial fraction; FL= free-living bacterial fraction; Day4= fourth day of culture growth; Day7= seventh day of culture growth.

| <b>Cluster1</b> |               |             |               |             |
|-----------------|---------------|-------------|---------------|-------------|
|                 | <b>SA</b>     |             | <b>FL</b>     |             |
| <b>Days</b>     | Quantity Mean | Quantity SD | Quantity Mean | Quantity SD |
| <b>Day4</b>     | 2.850962639   | 0.088266894 | 3.204114914   | 0.439069539 |
| <b>Day7</b>     | 9.169445038   | 1.758309007 | 1.82853353    | 0.187807962 |
| <b>Cluster2</b> |               |             |               |             |
|                 | <b>SA</b>     |             | <b>FL</b>     |             |
| <b>Days</b>     | Quantity Mean | Quantity SD | Quantity Mean | Quantity SD |
| <b>Day4</b>     | 4.156836987   | 0.520205617 | 0.114571519   | 0.026290052 |
| <b>Day7</b>     | 12.14747334   | 0.741565466 | 0.185813785   | 0.033655368 |
| <b>Cluster8</b> |               |             |               |             |
|                 | <b>SA</b>     |             | <b>FL</b>     |             |
| <b>Days</b>     | Quantity Mean | Quantity SD | Quantity Mean | Quantity SD |
| <b>Day4</b>     | 5.457804203   | 0.176898703 | 0.44285664    | 0.11048381  |
| <b>Day7</b>     | 9.304740906   | 1.28759563  | 3.954962969   | 0.157003194 |

**Table S8.** qPCR Slope, R<sup>2</sup> and % of Efficiency with specific primers for the evaluation of MAG abundance in SA-FL culture fractions samples.

| <b>Primer name</b>   | <b>Slope</b> | <b>R<sup>2</sup></b> | <b>Efficiency (%)</b> |
|----------------------|--------------|----------------------|-----------------------|
| <b>Cluster8_c608</b> | -3.291       | 0.999                | 97.212                |
| <b>Cluster2_c82</b>  | -3.270       | 0.992                | 102.227               |
| <b>Cluster1_c182</b> | -3.223       | 0.987                | 104.323               |

**Table S9.** qPCR quantization of MAG abundance in FE7-FL grown in different media.

| <b>Cluster1</b> |               |             |               |             |               |             |
|-----------------|---------------|-------------|---------------|-------------|---------------|-------------|
| <b>MB</b>       |               | <b>F/2¼</b> |               | <b>F/2¾</b> |               |             |
| <b>Days</b>     | Quantity Mean | Quantity SD | Quantity Mean | Quantity SD | Quantity Mean | Quantity SD |
| <b>Day3</b>     | 1.280346274   | 0.130211171 | 0.027051291   | 0.036026332 | 1.242784977   | 0.166221648 |
| <b>Day6</b>     | 0.029285605   | 0.006642076 | 13.66777325   | 0.425333649 | 16.20821953   | 1.267161489 |
| <b>Day10</b>    | 0.009822866   | 0.011881083 | 29.6822567    | 3.296260118 | 42.63631821   | 2.170769453 |
| <b>Cluster2</b> |               |             |               |             |               |             |
| <b>MB</b>       |               | <b>F/2¼</b> |               | <b>F/2¾</b> |               |             |
| <b>Days</b>     | Quantity Mean | Quantity SD | Quantity Mean | Quantity SD | Quantity Mean | Quantity SD |
| <b>Day3</b>     | 0.032683714   | 0.016084398 | 0.024166935   | 0.002645122 | 4.377933025   | 0.241250709 |
| <b>Day6</b>     | 0.061404854   | 0.039326753 | 18.35878563   | 0.782420158 | 30.27388763   | 2.298482418 |
| <b>Day10</b>    | 0.090489812   | 0.004574142 | 24.60587311   | 0.367527306 | 39.92933273   | 3.180368423 |
| <b>Cluster8</b> |               |             |               |             |               |             |
| <b>MB</b>       |               | <b>F/2¼</b> |               | <b>F/2¾</b> |               |             |
| <b>Days</b>     | Quantity Mean | Quantity SD | Quantity Mean | Quantity SD | Quantity Mean | Quantity SD |
| <b>Day3</b>     | 0.1362793     | 0.038577229 | 0.008         | 0.00915     | 2.689586878   | 0.452325106 |
| <b>Day6</b>     | 0.129597649   | 0.034835324 | 18.79345703   | 3.886913193 | 14.20588303   | 1.957057476 |
| <b>Day10</b>    | 0.095607392   | 0.018735146 | 27.99685478   | 2.574785471 | 39.20956039   | 2.05914402  |

**Table S10.** qPCR quantization of MAG abundance in FE7-FL grown in F/2¼ medium supplemented with DNase-treated sonicate.

| <b>F/2¼ (sonicate treated with DNase)</b> |               |                 |               |                 |               |             |
|-------------------------------------------|---------------|-----------------|---------------|-----------------|---------------|-------------|
| <b>Cluster1</b>                           |               | <b>Cluster2</b> |               | <b>Cluster8</b> |               |             |
| <b>Days</b>                               | Quantity Mean | Quantity SD     | Quantity Mean | Quantity SD     | Quantity Mean | Quantity SD |
| <b>Day2</b>                               | 0.096502073   | 0.042068169     | N/D           | N/D             | 0.000123611   | 6.98944E-05 |
| <b>Day4</b>                               | 0.410697669   | 0.012779716     | N/D           | N/D             | 0.195641135   | 0.02719987  |
| <b>Day7</b>                               | 1.694224715   | 0.283904761     | 4.922961235   | 0.426027685     | 0.537181735   | 0.017694673 |
| <b>Day9</b>                               | 2.03311801    | 0.131902337     | 8.805378914   | 0.84562999      | 0.418001503   | 0.036180586 |
| <b>N/D – Not detected</b>                 |               |                 |               |                 |               |             |

**Table S11.** qPCR Slope, R<sup>2</sup> and % of Efficiency with specific primers for the evaluation of MAG abundance in different media.

| Primer name   | Slope  | R <sup>2</sup> | Efficiency (%) |
|---------------|--------|----------------|----------------|
| Cluster8_c608 | -3.195 | 0.990          | 105.593        |
| Cluster2_c82  | -3.289 | 0.988          | 101.384        |
| Cluster1_c182 | -3.184 | 0.984          | 106.082        |

**Table S12.** antiSMASH detection of biosynthetic clusters in the whole metagenome.

| Whole metagenome biosynthetic clusters |                               |
|----------------------------------------|-------------------------------|
| n° of Biosynthetic clusters            | Type of Biosynthetic clusters |
| 2                                      | Ectoine                       |
| 5                                      | Terpenes                      |
| 3                                      | T1PKS                         |
| 1                                      | T3PKS                         |
| 9                                      | NRPS                          |
| 3                                      | Bacteriocin                   |
| 1                                      | RRE-containing                |
| 2                                      | hserlactone                   |
| 1                                      | betalactone                   |
| 1                                      | Ranthipeptide                 |
| 1                                      | arylpolyene                   |
| 1                                      | Redox-cofactor                |

**Table S13.** List of primers used for amplification of the selected gene clusters.

| <b>Primer Name</b>     | <b>Forward Sequence</b> | <b>Reverse Sequence</b> | <b>Tm (°C)</b> | <b>Amplicon length (bp)</b> |
|------------------------|-------------------------|-------------------------|----------------|-----------------------------|
| <b>C8_c988</b>         | AGCTTCAAACGTATCGATCA    | CTCAAACAGGCAATTGGATG    | 59.9/63.1      | 206                         |
| <b>C8_c608</b>         | GCTCCAGTGTTTTAACCGG     | CCATCTATTCTGCCGACC      | 62.1/60.7      | 251                         |
| <b>C8_c450</b>         | TCGCCAATACTGATTATGCT    | GTCGTAGTTCCTAAGGTCAC    | 59.7/55.3      | 169                         |
| <b>C1_c182</b>         | CTGATCTGTTATATGATGCGGA  | GACATGACAGTGATGCATTG    | 61.3/60.2      | 161                         |
| <b>C2_c82</b>          | GTATCAATATCGGGCAGTGT    | CGATATTCCAAATGTGAGCG    | 58.9/63.0      | 243                         |
| <b>E9/ U1510 (16s)</b> | GAGTTTGATCCTGGCTCAG     | GGCTTACCTTGTTACGACTT    | 60/53.1        | 1500                        |

**Supplementary information:** Sequences of the cluster-specific genes.

**C8\_c988**

>Diatom\_S1\_L001\_R1\_001\_(paired)\_unmapped\_reads\_[Diatom\_S1\_L001\_R1\_001]  
(paired)\_trimmed\_(paired)\_not\_merged\_contig\_988 Average coverage: 35.51

AGCTTCAAACGTATCGATCAAAAGCCACTTGGTCATACCCTCATATTTACGATAGTGGTGGTAAGAGTAGGTTTTTCCAT  
CTTCTGAAAAGACATGCTCCCTGCGTACCTCAAACCTTCCGGTCTCGTCCTTCACAGAGTCTTCATACAGGAGTTTTTTA  
CCTTTGAATTTCAAAGAGATTTGATCCATCCAATTGCCTGTTTGAG

**C8\_c608**

>Diatom\_S1\_L001\_R1\_001\_(paired)\_unmapped\_reads\_[Diatom\_S1\_L001\_R1\_001]  
(paired)\_trimmed\_(paired)\_not\_merged\_contig\_608 Average coverage: 28.01

GCTCCAGTGTTTTTAACCGTTCTGGTTCAGGAGCTGGGGTGATTGCCTCTTTTGTTTCCTGTCTGCTTCCGTTTTAGCC  
TCTTCTTCTTTTTGCTCTTTTAGTGCCGCTGGTGCCGGCAGTATAGGCGCTACTGCCACTGGCGTTTTCAACCTGAGCAAC  
GGCAACGACCGTCTCTTCTACAACGGTTGCAAAATCATGCTCATCCATAATAATGGCTTTGAGCAAGGCACGGTCGGCAG  
AATAGATGG

**C8\_c450**

>Diatom\_S1\_L001\_R1\_001\_(paired)\_unmapped\_reads\_[Diatom\_S1\_L001\_R1\_001]  
(paired)\_trimmed\_(paired)\_not\_merged\_contig\_450 Average coverage: 39.94

TCGCCAATACTGATTATGCTTTAAGTAATGCTACCATTACCATTCTGGACGGAGCCACAACCGGTATGATCACTTTTACT  
ATTCAGGATGATGCGGATATTGAAGGAGACGAGACCGCTACTTTGACGCTCAGCAATCCATCAGCAGGTGTGACCTTAGG  
AACTACGAC

**C1\_c182**

>Diatom\_S1\_L001\_R1\_001\_(paired)\_unmapped\_reads\_[Diatom\_S1\_L001\_R1\_001]  
(paired)\_trimmed\_(paired)\_not\_merged\_contig\_182 Average coverage: 738.28

CTGATCTGTTATGATGCGGAATTCCCCTTGCTGGCGCGCGCGCTGGCGGAGGCCGACATCATTCTGGTGCCCTCGTGAC  
CGACGCGTTGTGGGGCTATTGGCGGGTGCGAATCGGGGCTATGGCCGCGCGTTGGAAGGGCAATGCATCACTGTCATGT  
C

**C2\_c82**

>Diatom\_S1\_L001\_R1\_001\_(paired)\_unmapped\_reads\_[Diatom\_S1\_L001\_R1\_001]  
(paired)\_trimmed\_(paired)\_not\_merged\_contig\_82 Average coverage: 66.46

GTATCAATATCGGGCAGTGTGTCGAGAAGGGCGACGCGGGCGTCTTTCAGATTGGCGCGGGTATCGGCGAGCGCATGTTTC  
CGTTGACCAGCGCACATTGTCTGAAGATCGAGCGCACATGAGGAAAACGCTTCAGGCCACCAGCCAATAGCCGCCGTCTT  
CCGCCGCCCCAAAGACAGCATCATGATTGCTCAAAGCTTTGAACGCGGCTGCGATGCGTGTGTCGCTCACATTTGGAATA  
TCG
